# Supplementary material for: Selective enhancement of graphene ammonia sensing by electrochemical palladium nanoparticle decoration: ab initio insights into the sensing response
Source: Royal Society of Chemistry journal article supplement (doi:10.1039/d5nr02547h), 2025-01-01
Supplement: d5nr02547h1.pdf [file d5nr02547h1.pdf]

## SUPPORTING INFORMATION to:

# Selective enhancement of graphene ammonia sensing by electrochemical palladium nanoparticle decoration: *ab-initio* insight on the sensing response

*Sonia Freddi*<sup>1,2,\*</sup>, *Pilar Carro*<sup>3</sup>, *Alberto Hernandez Creus*<sup>3</sup>, *Luigi Sangaletti*<sup>2</sup>,  
*Miriam C. Rodriguez Gonzalez*<sup>3,\*</sup>

<sup>1</sup> Institute of Photonics and Nanotechnologies - Consiglio Nazionale delle Ricerche (IFN CNR), Laboratory for Nanostructure Epitaxy and Spintronics on Silicon (LNESS), Via Anzani 42, 22100 Como, Italy

<sup>2</sup> Surface Science and Spectroscopy Lab at I-Lamp, Department of Mathematics and Physics, Università Cattolica del Sacro Cuore, via della Garzetta 48, 25133 Brescia (Italy)

<sup>3</sup> Área de Química Física, Departamento de Química, Instituto de Materiales y Nanotecnología (IMN), Universidad de La Laguna (ULL), 38200 La Laguna (Spain)

\* Correspondence to be sent to: [sonia.freddi@cnr.it](mailto:sonia.freddi@cnr.it), [mrodrigon@ull.edu.es](mailto:mrodrigon@ull.edu.es)

### CONTENT:

1. Gas measurement set up.
2. Raman maps and AFM size distribution.
3. Benchmarking with literature and Freundlich fitting parameters.
4. Theoretical calculation.

## 1. Gas measurement set up

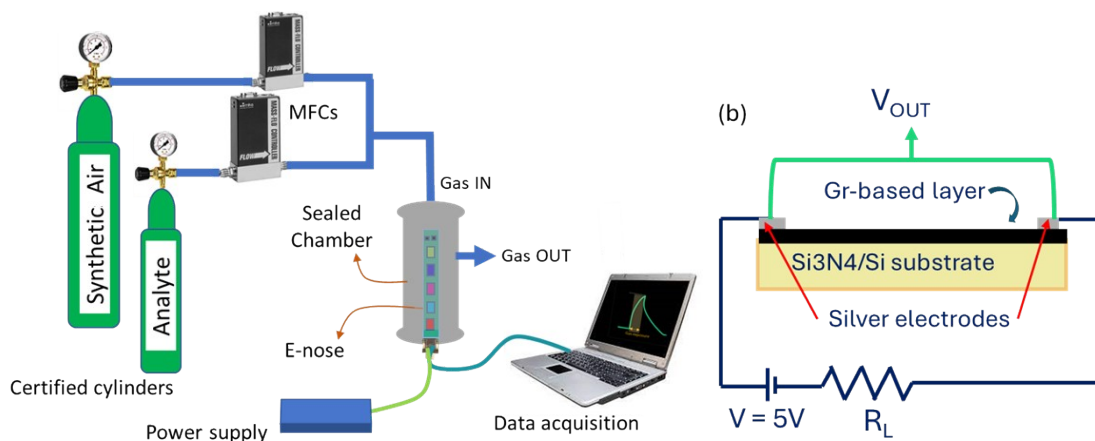

## 2. Raman maps and AFM size distribution

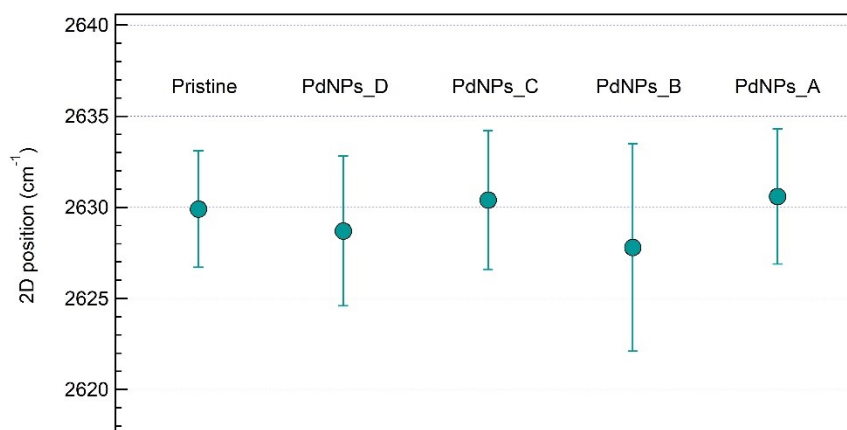

**Figure S2.** Results obtained from the Raman maps of the 2D-band collected on several areas of the samples. No shift towards higher or lower wavenumber is observed for the decorated samples compared to the pristine position, indicating that the functionalization does not alter the doping nature of the graphene layer.

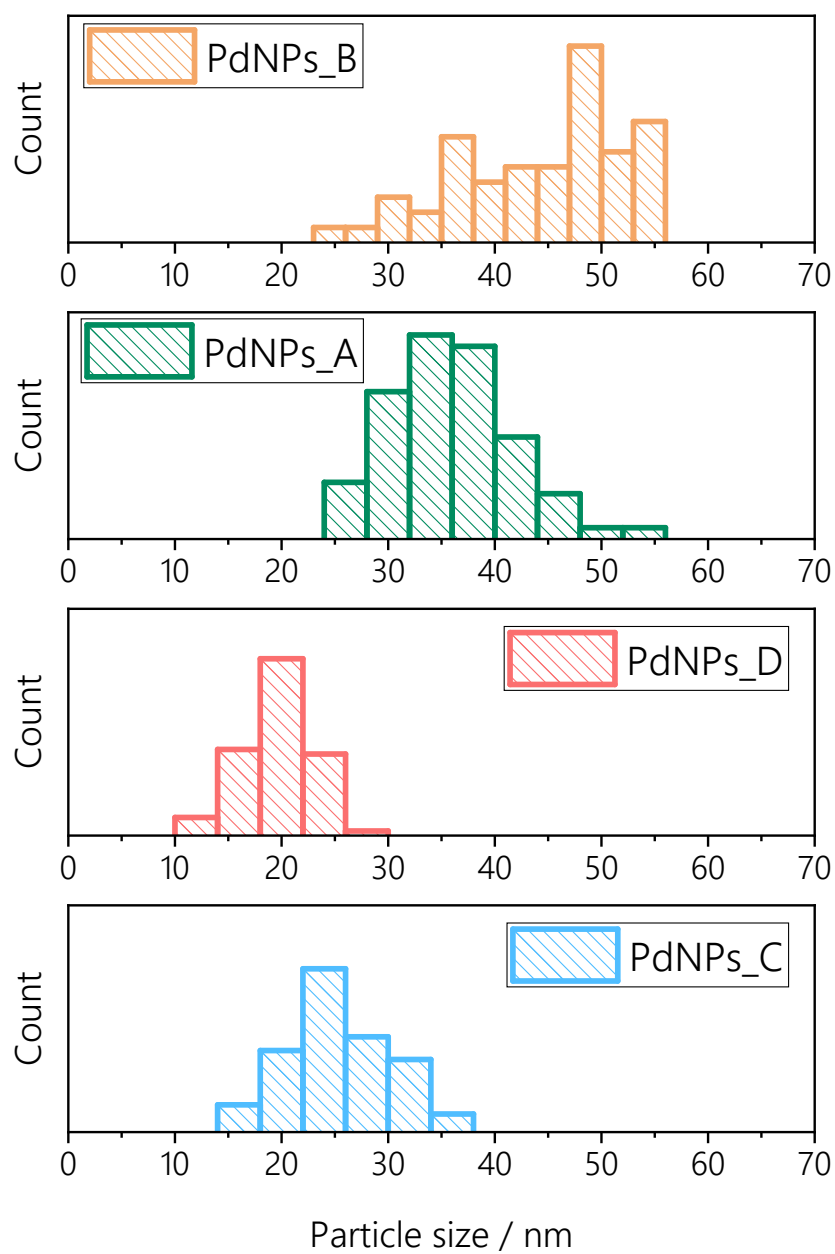

**Figure S3:** size distribution of the Pd NPs obtained from several AFM images.

### 3. Benchmarking with literature and Freundlich fitting parameters

**Table S1:** pow and A parameters obtained from the Freundlich isotherm interpolation of each sensor calibration curve for NH<sub>3</sub> exposures, reported in **Figure 3** of the main text.

| Sample name | pow         | A               |
|-------------|-------------|-----------------|
| Pristine    | 0.53 ± 0.09 | 0.0020 ± 0.0006 |
| PdNPs_D     | 0.59 ± 0.05 | 0.0235 ± 0.0002 |
| PdNPs_C     | 0.59 ± 0.08 | 0.0210 ± 0.0008 |
| PdNPs_B     | 0.83 ± 0.07 | 0.0072 ± 0.0003 |
| PdNPs_A     | 0.92 ± 0.09 | 0.0048 ± 0.0007 |

**Table S2:** Benchmarking for dynamical tested range, sensitivity S range ( $S=(|\Delta R/R_0| \times 100)/[\text{gas}]$ ), detection limit (dl) and response and recovery times of the prepared samples, against the values for other graphene-based chemiresistors reported in the literature.[Refs 14,64-80 in the main text] Of note: only articles reporting gas concentration and sensor response/sensitivity have been taken into account for this benchmarking

| Sensor type | Gas:<br>dynamic<br>tested<br>range<br>(ppm) | Sensitivity<br>range<br>(%ppm <sup>-1</sup> ) | Detection<br>limit<br>(ppb) | Response<br>time   | Recovery<br>time    | Reference    |
|-------------|---------------------------------------------|-----------------------------------------------|-----------------------------|--------------------|---------------------|--------------|
| PdNPs_A     | 0.5 – 24.3                                  | 0.71 – 0.34                                   | 42                          | 100sec<br>@0.92ppm | 13min<br>@0.92ppm   | Present work |
| PdNPs_B     | 0.5 – 24.3                                  | 0.87 – 0.39                                   | 32                          | 100sec<br>@0.92ppm | 15min<br>@0.92ppm   | Present work |
| PdNPs_C     | 0.5 – 24.3                                  | 1.52 – 0.46                                   | 13                          | 100sec<br>@0.92ppm | 25min<br>@0.92ppm   | Present work |
| PdNPs_D     | 0.5 – 24.3                                  | 2.62 – 0.52                                   | 6                           | 100sec<br>@0.92ppm | 24min<br>@0.92ppm   | Present work |
| Gr_CoPt     | 2.2 – 36.0                                  | 0.8 – 0.24                                    | 0.1                         | -                  | 15 min<br>@36ppm    | 77           |
| Gr_CuPR     | 0.2 – 14.0                                  | 0.62 – 0.12                                   | 5                           | 30 sec<br>@13.6ppm | 700 sec<br>@13.6ppm | 80           |
| Gr-NiPc     | 0.04 - 4.7                                  | 8.6 – 0.5                                     | 3                           | 132 sec<br>@2.7ppm | 11 min<br>@2.7ppm   | 79           |
| NiPc-Gr     | 5.0 – 10.0                                  | 0.45 – 0.15                                   | -                           | -                  | -                   | 78           |
| Gr_NiPc     | 0.5 – 13.6                                  | 0.64 – 0.11                                   | 50                          | -                  | 2.5 min             | 14           |

|                     |             |              |       |                  |                |    |
|---------------------|-------------|--------------|-------|------------------|----------------|----|
|                     |             |              |       |                  | @3.7ppm        |    |
| Gr-TCN              | 0.85 – 22.5 | 6.3 – 1.5    | 4.2   | 50 sec @11ppm    | 8 min @11ppm   | 76 |
| Gr_NBD              | 0.05 – 8.4  | 10.78 – 0.45 | -     | -                | -              | 75 |
| Bare Gr             | 150 – 1000  | 0.03– 0.0185 | 1600  | -                | -              | 74 |
| B-doped Gr          | 16 – 256    | 0.12 – 0.09  | -     | 0.85 sec @32 ppm | -              | 73 |
| CVD graphene        | 100 – 800   | 0.05-0.01    | -     | 7 min @100ppm    | 15 min @100ppm | 72 |
| Laser written Gr    | 75 – 400    | 0.04 – 0.075 | -     | -                | -              | 71 |
| B-doped Gr          | 1 – 20      | 0.04 –0.042  | 59.9  | -                | -              | 70 |
| TiO2@PPy–GN         | 10 – 200    | 2.4 –1.3     | 1000  | 36 sec @50ppm    | 16min @50ppm   | 69 |
| Graphene/mica       | 20 – 500    | 0.05 – 0.04  | -     | -                | -              | 68 |
| graphene– PEDOT:PSS | 25 – 1000   | 0.2 – 0.019  | 10000 | 3 min @25 ppm    | 6 min @25ppm   | 67 |
| graphene/PANI       | 1 – 6400    | 0.05 – 0.20  | 1000  | 50 sec @20ppm    | 23 sec @ 20ppm | 66 |
| CVD graphene        | 0.5 – 1000  | 0.03 – 0.91  | 500   | -                | 140 min @10ppm | 65 |
| Gr_AuNPs            | 15 – 58     | 0.18 – 0.14  | -     | -                | 54 min @58ppm  | 64 |

#### 4. Theoretical calculation

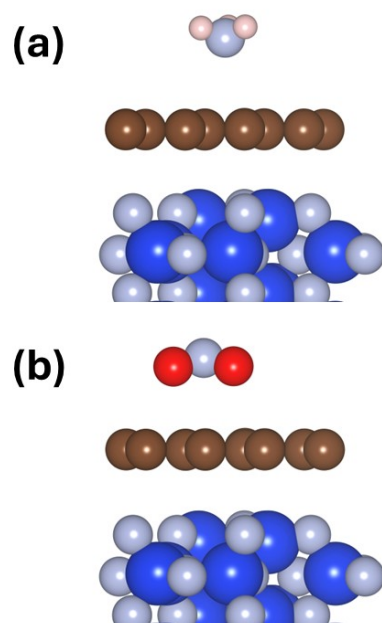

**Figure S4:** Side view of the adsorption of (a) ammonia and (b) nitrogen dioxide on graphene on  $\text{Si}_3\text{N}_4$  surface.
